# Supplementary material for: Optimization of Pressurized Liquid Extraction (PLE) Parameters for Extraction of Bioactive Compounds from Moringa oleifera Leaves and Bioactivity Assessment
Source: MDPI journal article supplement (doi:10.3390/ijms25094628), 2024-04-24
Supplement: s1 [file s1]

# Optimization of Pressurized Liquid Extraction (PLE) Parameters for Extraction of Bioactive Compounds from *Moringa oleifera* Leaves and Bioactivity Assessment

Theodoros Chatzimitakos, Vassilis Athanasiadis \*, Konstantina Kotsou, Martha Mantiniotou, Dimitrios Kalompatsios, Ioannis Makrygiannis, Eleni Bozinou and Stavros I. Lalas

Department of Food Science and Nutrition, University of Thessaly, Terma N. Temponera Street, 43100 Karditsa, Greece; tchatzimitakos@uth.gr (T.C.); kkotsou@agr.uth.gr (K.K.); mmantiniotou@uth.gr (M.M.); dkalompatsios@uth.gr (D.K.); ioanmakr1@uth.gr (I.M.); empouzinou@uth.gr (E.B.); slalas@uth.gr (S.I.L.)  
\* Correspondence: vaathanasiadis@uth.gr; Tel.: +30-24410-64783

**Table S1.** Response surface methodology (RSM) employed mathematical models for optimizing the extraction of *M. oleifera*. These models exclusively included significant terms.

| Responses | Second-Order Polynomial Equations (Models)                                                                                                                                                     | R <sup>2</sup><br>Predicted | R <sup>2</sup><br>Adjusted | p-Value  | Eq.  |
|-----------|------------------------------------------------------------------------------------------------------------------------------------------------------------------------------------------------|-----------------------------|----------------------------|----------|------|
| TPC       | $Y = 68.91 - 0.42X_1 - 0.03X_2 - 0.67X_3 - 1.18X_4 + 0.002X_1^2 + 0.0001X_2^2 + 0.002X_3^2 + 0.04X_4^2 - 0.0001X_1X_2 + 0.004X_1X_3 - 0.006X_1X_4 + 0.0001X_2X_3 - 0.0001X_2X_4 + 0.004X_3X_4$ | 0.9155                      | 0.8169                     | 0.0002   | (S1) |
| TFC       | $Y = 50.89 - 0.29X_1 - 0.02X_2 - 0.52X_3 - 0.94X_4 + 0.001X_1^2 + 0.0001X_2^2 + 0.001X_3^2 + 0.03X_4^2 - 0.0001X_1X_2 + 0.004X_1X_3 - 0.004X_1X_4 + 0.0001X_2X_3 + 0.0001X_2X_4 + 0.002X_3X_4$ | 0.9189                      | 0.8242                     | 0.0002   | (S2) |
| FRAP      | $Y = 295.64 - 1.93X_1 - 0.16X_2 - 2.5X_3 - 4.39X_4 + 0.02X_1^2 + 0.0001X_2^2 + 0.005X_3^2 + 0.21X_4^2 - 0.0005X_1X_2 + 0.02X_1X_3 - 0.04X_1X_4 + 0.0004X_2X_3 + 0.0001X_2X_4 + 0.006X_3X_4$    | 0.9396                      | 0.8690                     | < 0.0001 | (S3) |
| DPPH      | $Y = 408.04 - 2.55X_1 - 0.2X_2 - 3.52X_3 - 8.13X_4 + 0.01X_1^2 + 0.0001X_2^2 + 0.009X_3^2 + 0.25X_4^2 - 0.0001X_1X_2 + 0.02X_1X_3 - 0.02X_1X_4 + 0.0004X_2X_3 + 0.0007X_2X_4 + 0.02X_3X_4$     | 0.9220                      | 0.8311                     | 0.0001   | (S4) |
| AHPA      | $Y = 673.42 - 5.13X_1 - 0.4X_2 - 4.44X_3 - 9.98X_4 + 0.03X_1^2 + 0.0001X_2^2 + 0.005X_3^2 + 0.09X_4^2 + 0.0002X_1X_2 + 0.04X_1X_3 - 0.02X_1X_4 + 0.001X_2X_3 + 0.005X_2X_4 + 0.02X_3X_4$       | 0.9328                      | 0.8543                     | < 0.0001 | (S5) |

**Table S2.** Maximum predicted responses and optimum extraction conditions for the dependent variables.

| Responses            | Optimal Conditions         |                           |                          |                         |                          |
|----------------------|----------------------------|---------------------------|--------------------------|-------------------------|--------------------------|
|                      | Maximum Predicted Response | R, mL/g (X <sub>1</sub> ) | P, psi (X <sub>2</sub> ) | T, °C (X <sub>3</sub> ) | t, min (X <sub>4</sub> ) |
| TPC (mg GAE/g dw)    | 25.83 ± 3.23               | 65                        | 1650                     | 150                     | 15                       |
| TFC (mg RtE/g dw)    | 20.13 ± 2.69               | 70                        | 1500                     | 150                     | 14                       |
| FRAP (μmol AAE/g dw) | 131.13 ± 14.49             | 70                        | 1640                     | 150                     | 15                       |
| DPPH (μmol AAE/g dw) | 143.21 ± 17.81             | 60                        | 1640                     | 150                     | 22                       |
| AHPA (μmol AAE/g dw) | 253.24 ± 31.50             | 70                        | 1630                     | 150                     | 16                       |

TPC: Total polyphenol content; TFC: Total flavonoid content; FRAP: Ferric reducing antioxidant power; DPPH: 2,2-Diphenyl-1-picrylhydrazyl; AHPA: Anti-Hydrogen Peroxide Activity.

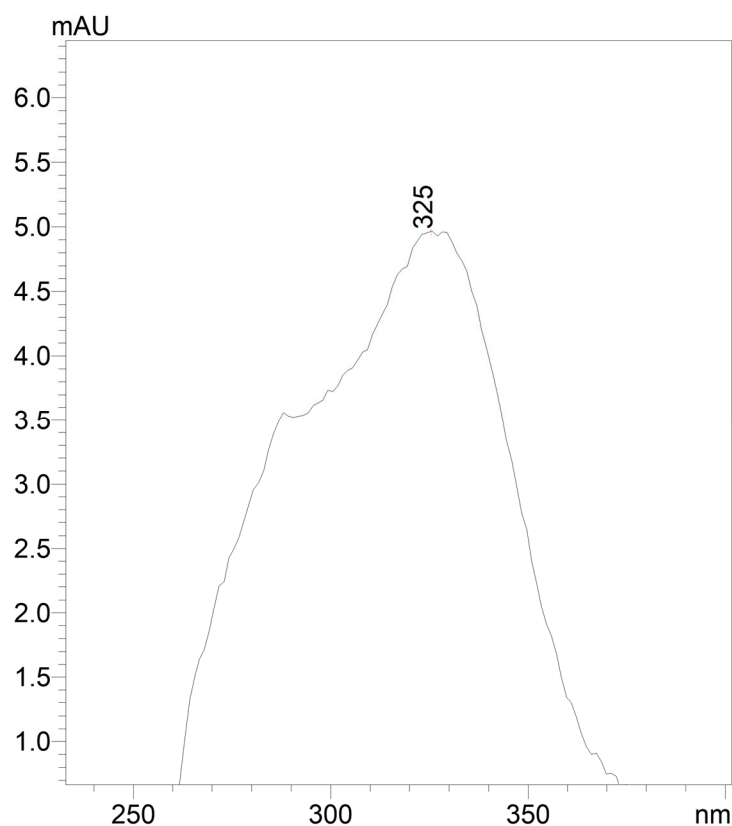

**Figure S1.** Ultraviolet spectra of unknown compound at retention time 22.91 min, according to the HPLC chromatograph.

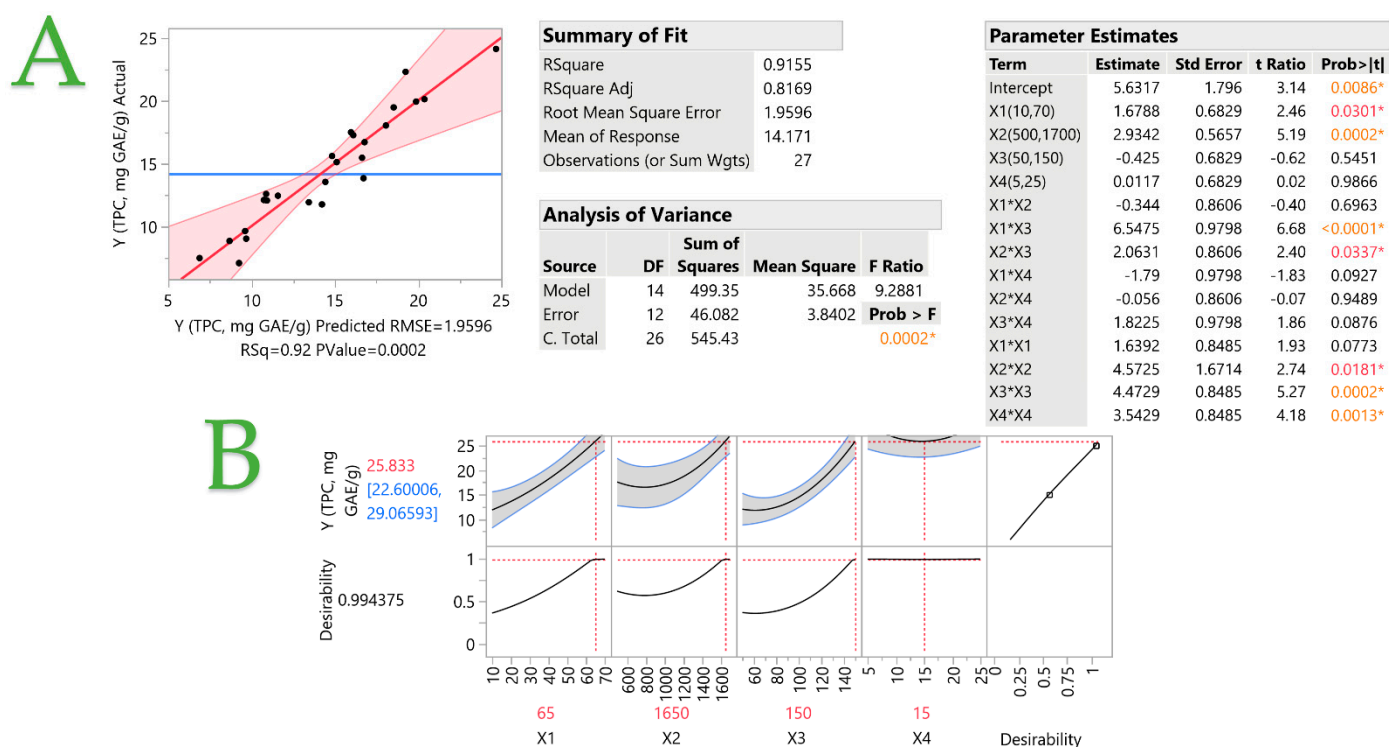

**Figure S2.** Plot **A** displays the actual response versus the predicted response (Total polyphenol content – TPC, mg GAE/g) for the optimization of *M. oleifera* extracts using different PLE extraction parameters, and plot **B** displays the desirability function. Asterisks and colored values denote statistically significant values, while inset tables include statistics relevant to the evaluation of the resulting model.

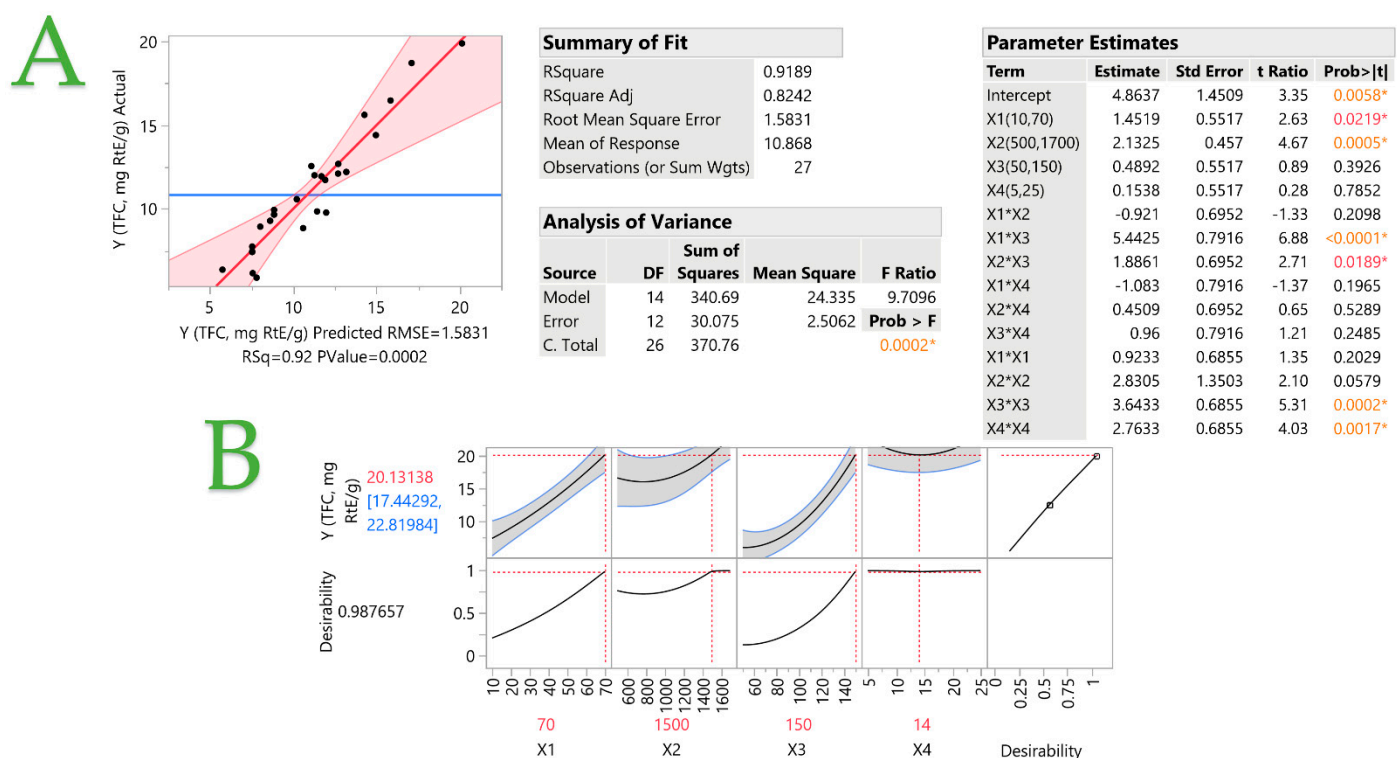

**Figure S3.** Plot A displays the actual response versus the predicted response (Total flavonoid content – TFC, mg RtE/g) for the optimization of *M. oleifera* extracts using different PLE extraction parameters, and parameters, and plot B displays the desirability function. Asterisks and colored values denote statistically significant values, while inset tables include statistics relevant to the evaluation of the resulting model.

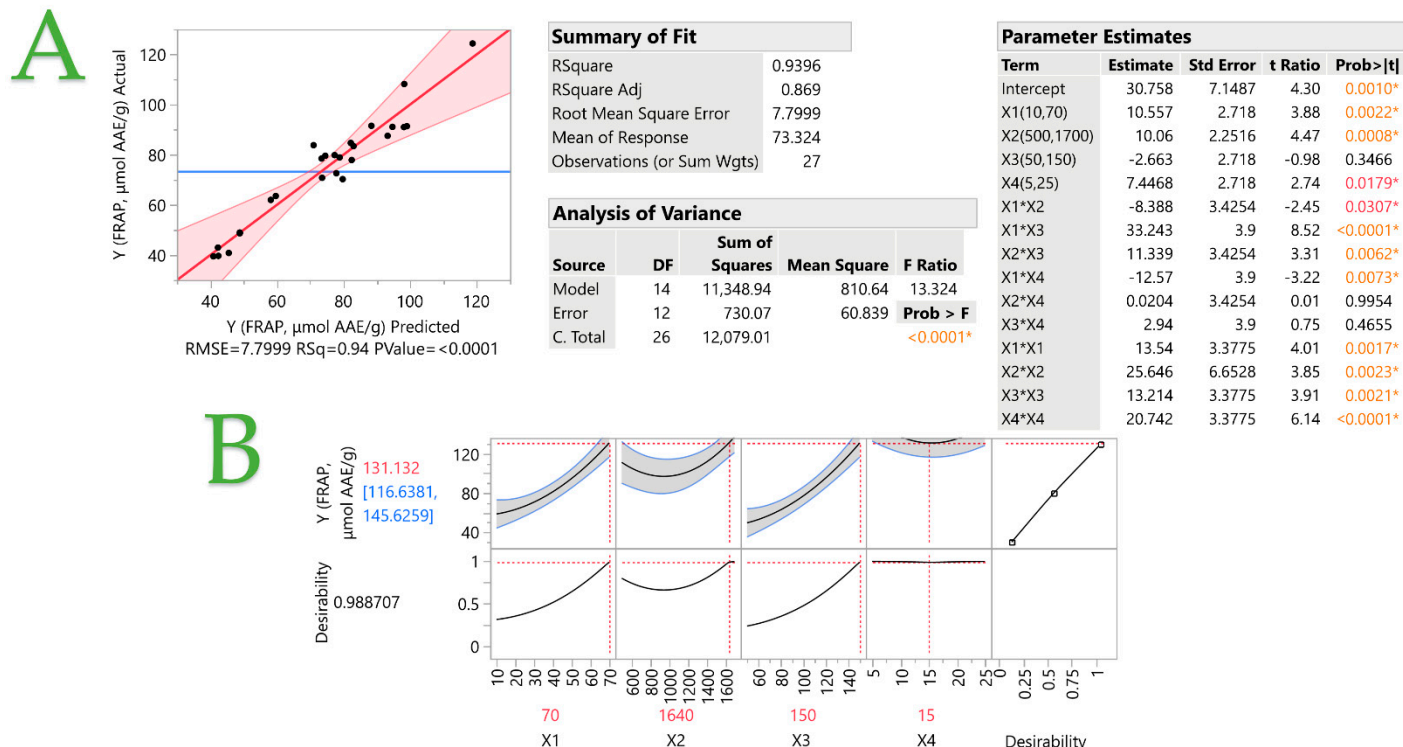

**Figure S4.** Plot A displays the actual response versus the predicted response (FRAP, μmol AAE/g) for the optimization of *M. oleifera* extracts using different PLE extraction parameters, and parameters, and plot B displays the desirability function. Asterisks and colored values denote statistically significant values, while inset tables include statistics relevant to the evaluation of the resulting model.

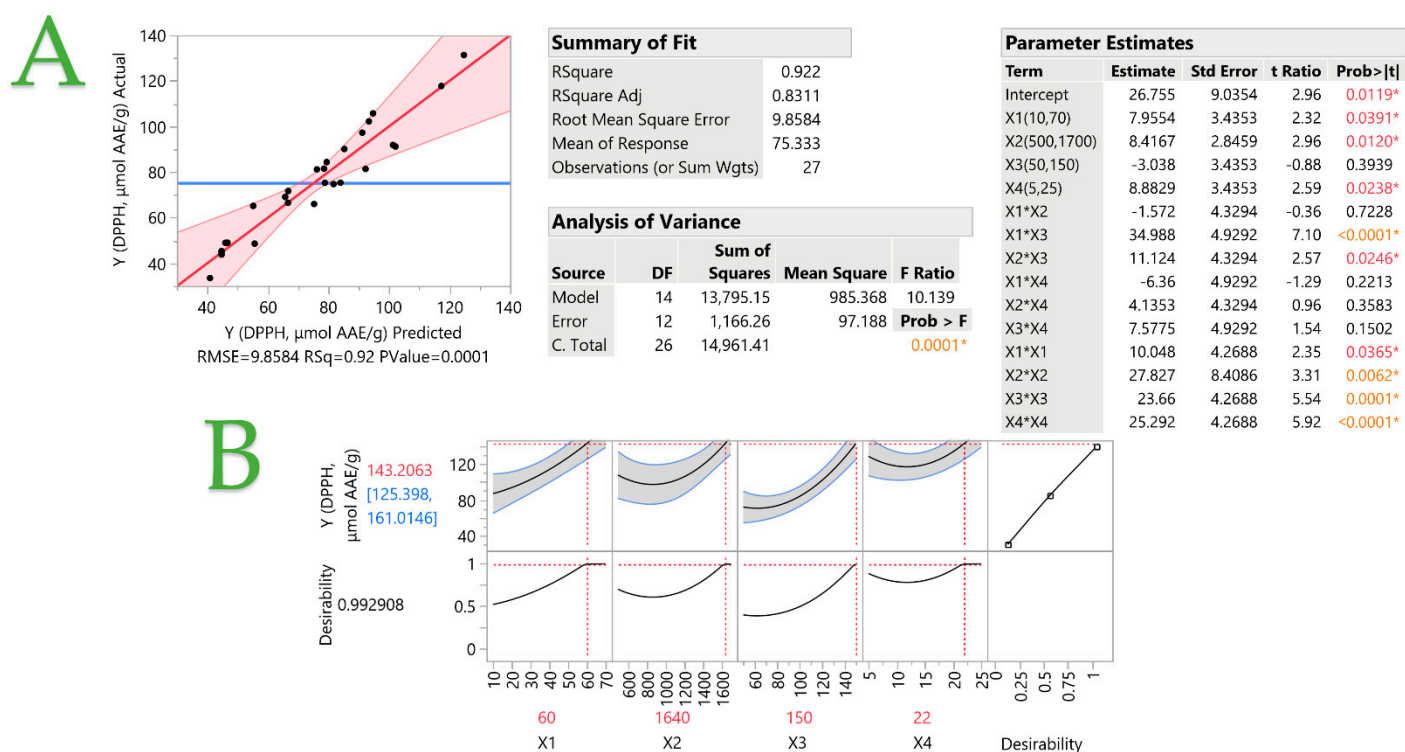

**Figure S5.** Plot **A** displays the actual response versus the predicted response (DPPH,  $\mu\text{mol AAE/g}$ ) for the optimization of *M. oleifera* extracts using different PLE extraction parameters, and plot **B** displays the desirability function. Asterisks and colored values denote statistically significant values, while inset tables include statistics relevant to the evaluation of the resulting model.

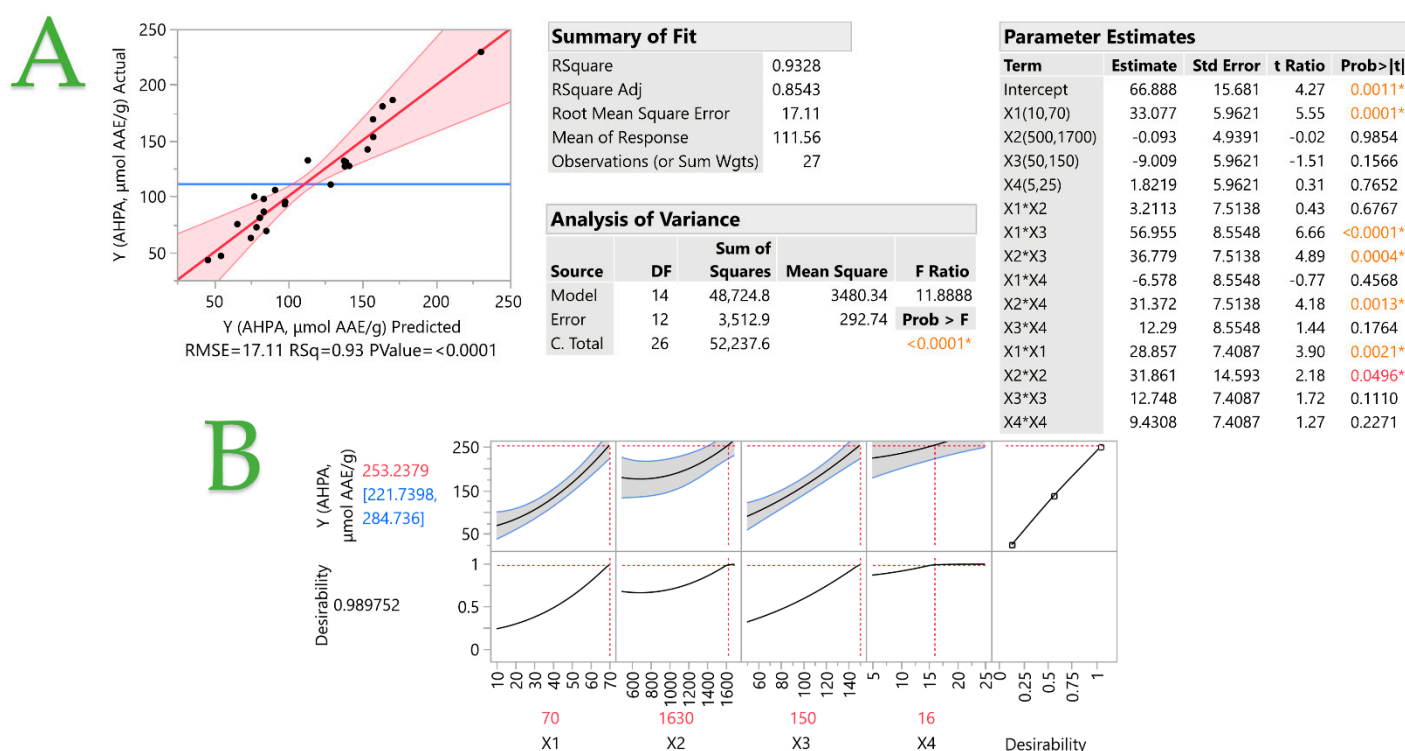

**Figure S6.** Plot **A** displays the actual response versus the predicted response (Anti-Hydrogen Peroxide Activity – AHPA,  $\mu\text{mol AAE/g}$ ) for the optimization of *M. oleifera* extracts using different PLE extraction parameters, and plot **B** displays the desirability function. Asterisks and colored values denote statistically significant values, while inset tables include statistics relevant to the evaluation of the resulting model.

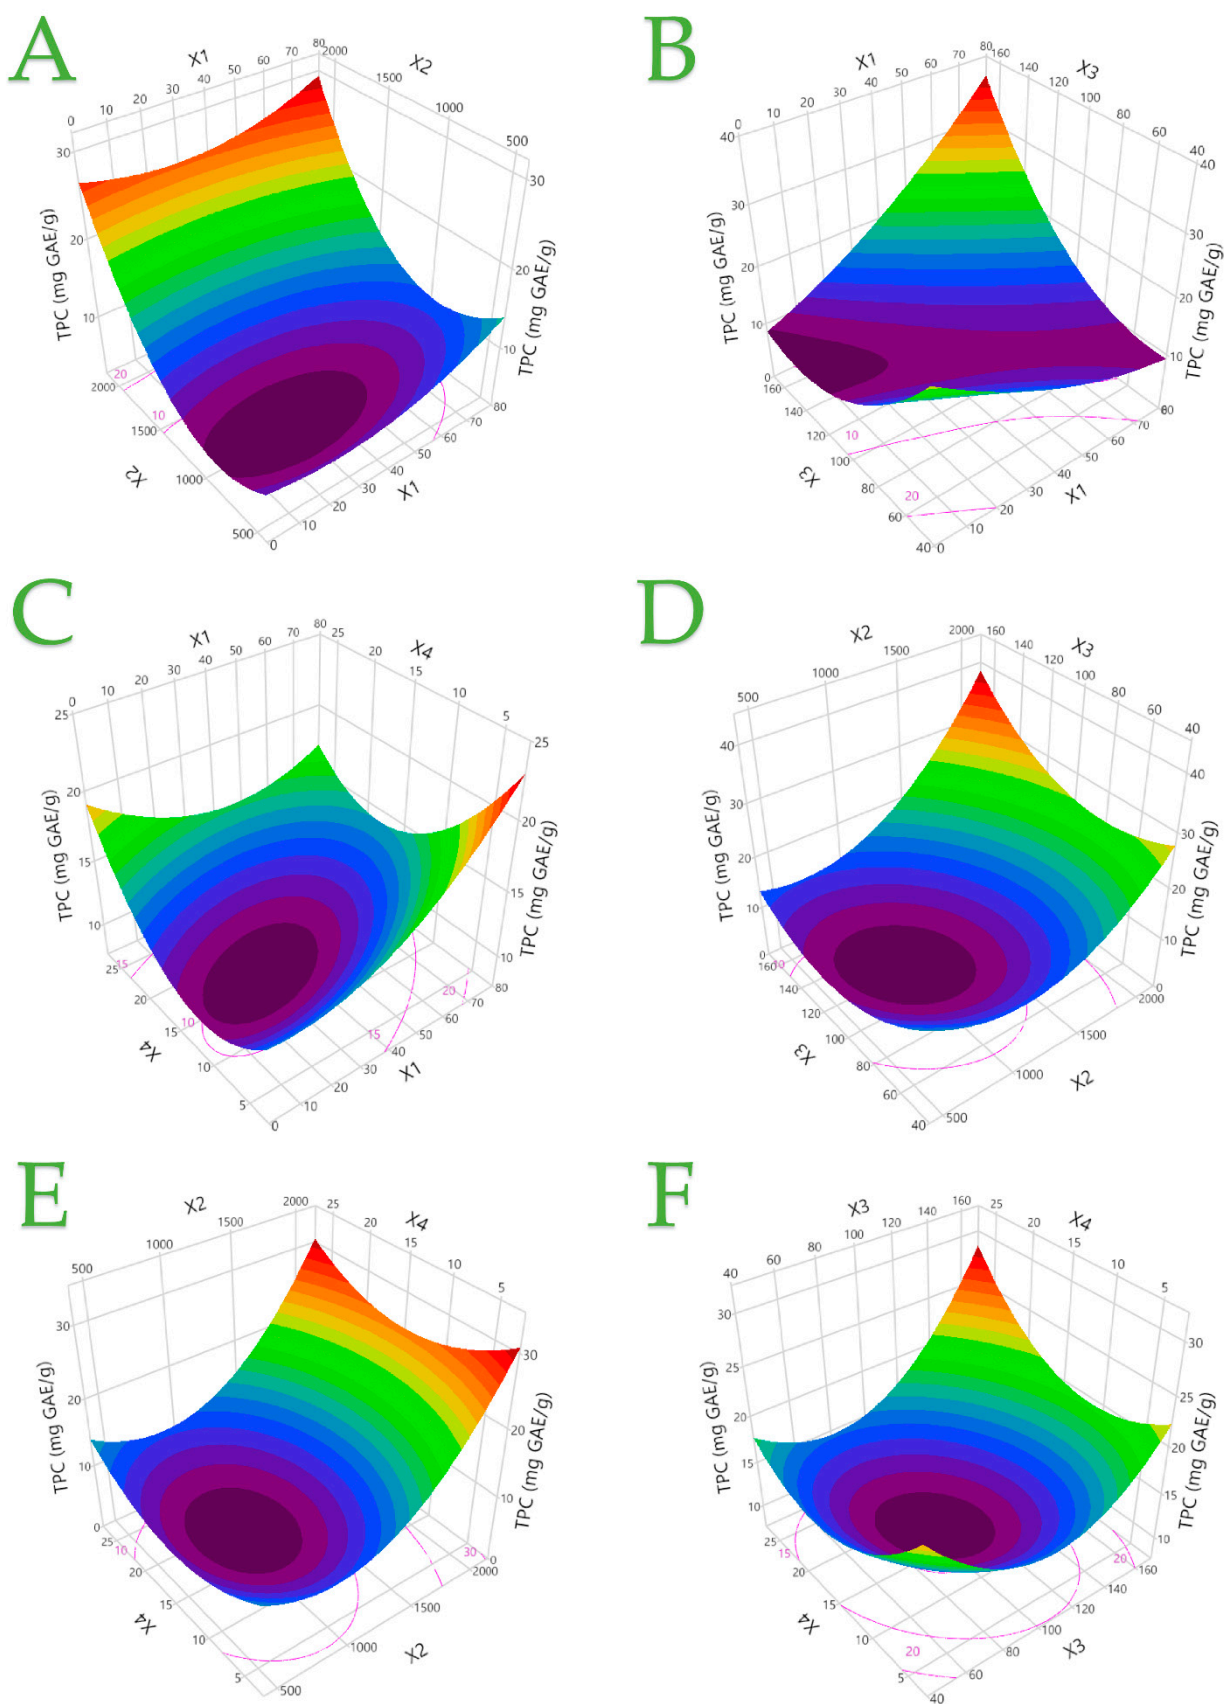

**Figure S7.** The optimal extraction of *M. oleifera* extracts is illustrated in 3D graphs that show the impact of the process variables considered in the response (Total polyphenol content – TPC, mg GAE/g). Plot (A), covariation of  $X_1$  and  $X_2$ ; plot (B), covariation of  $X_1$  and  $X_3$ ; plot (C), covariation of  $X_1$  and  $X_4$ ; plot (D), covariation of  $X_2$  and  $X_3$ ; plot (E), covariation of  $X_2$  and  $X_4$ ; plot (F), covariation of  $X_3$  and  $X_4$ .



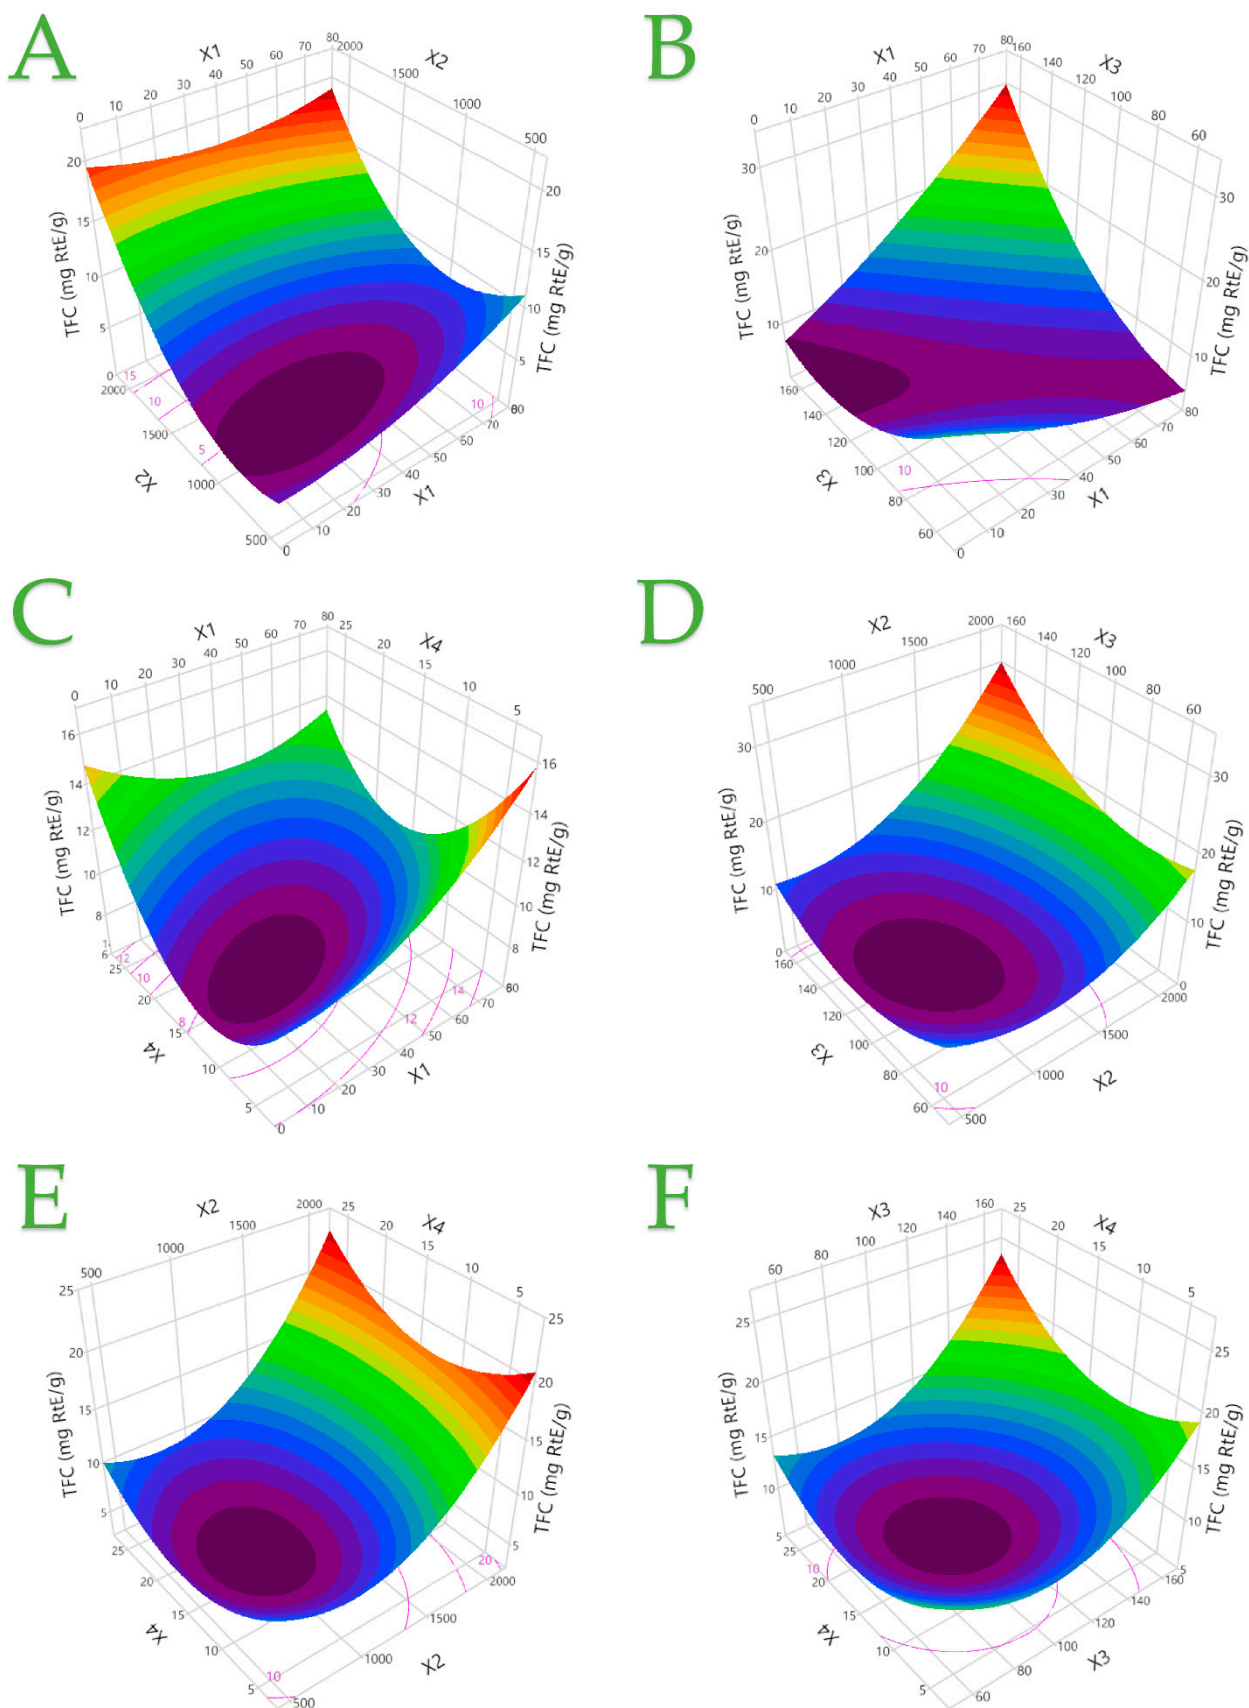

**Figure S8.** The optimal extraction of *M. oleifera* extracts is shown in 3D graphs that show the impact of the process variables considered in the response (Total flavonoid content – TFC, mg RtE/g). Plot (A), covariation of  $X_1$  and  $X_2$ ; plot (B), covariation of  $X_1$  and  $X_3$ ; plot (C), covariation of  $X_1$  and  $X_4$ ; plot (D), covariation of  $X_2$  and  $X_3$ ; plot (E), covariation of  $X_2$  and  $X_4$ ; plot (F), covariation of  $X_3$  and  $X_4$ .

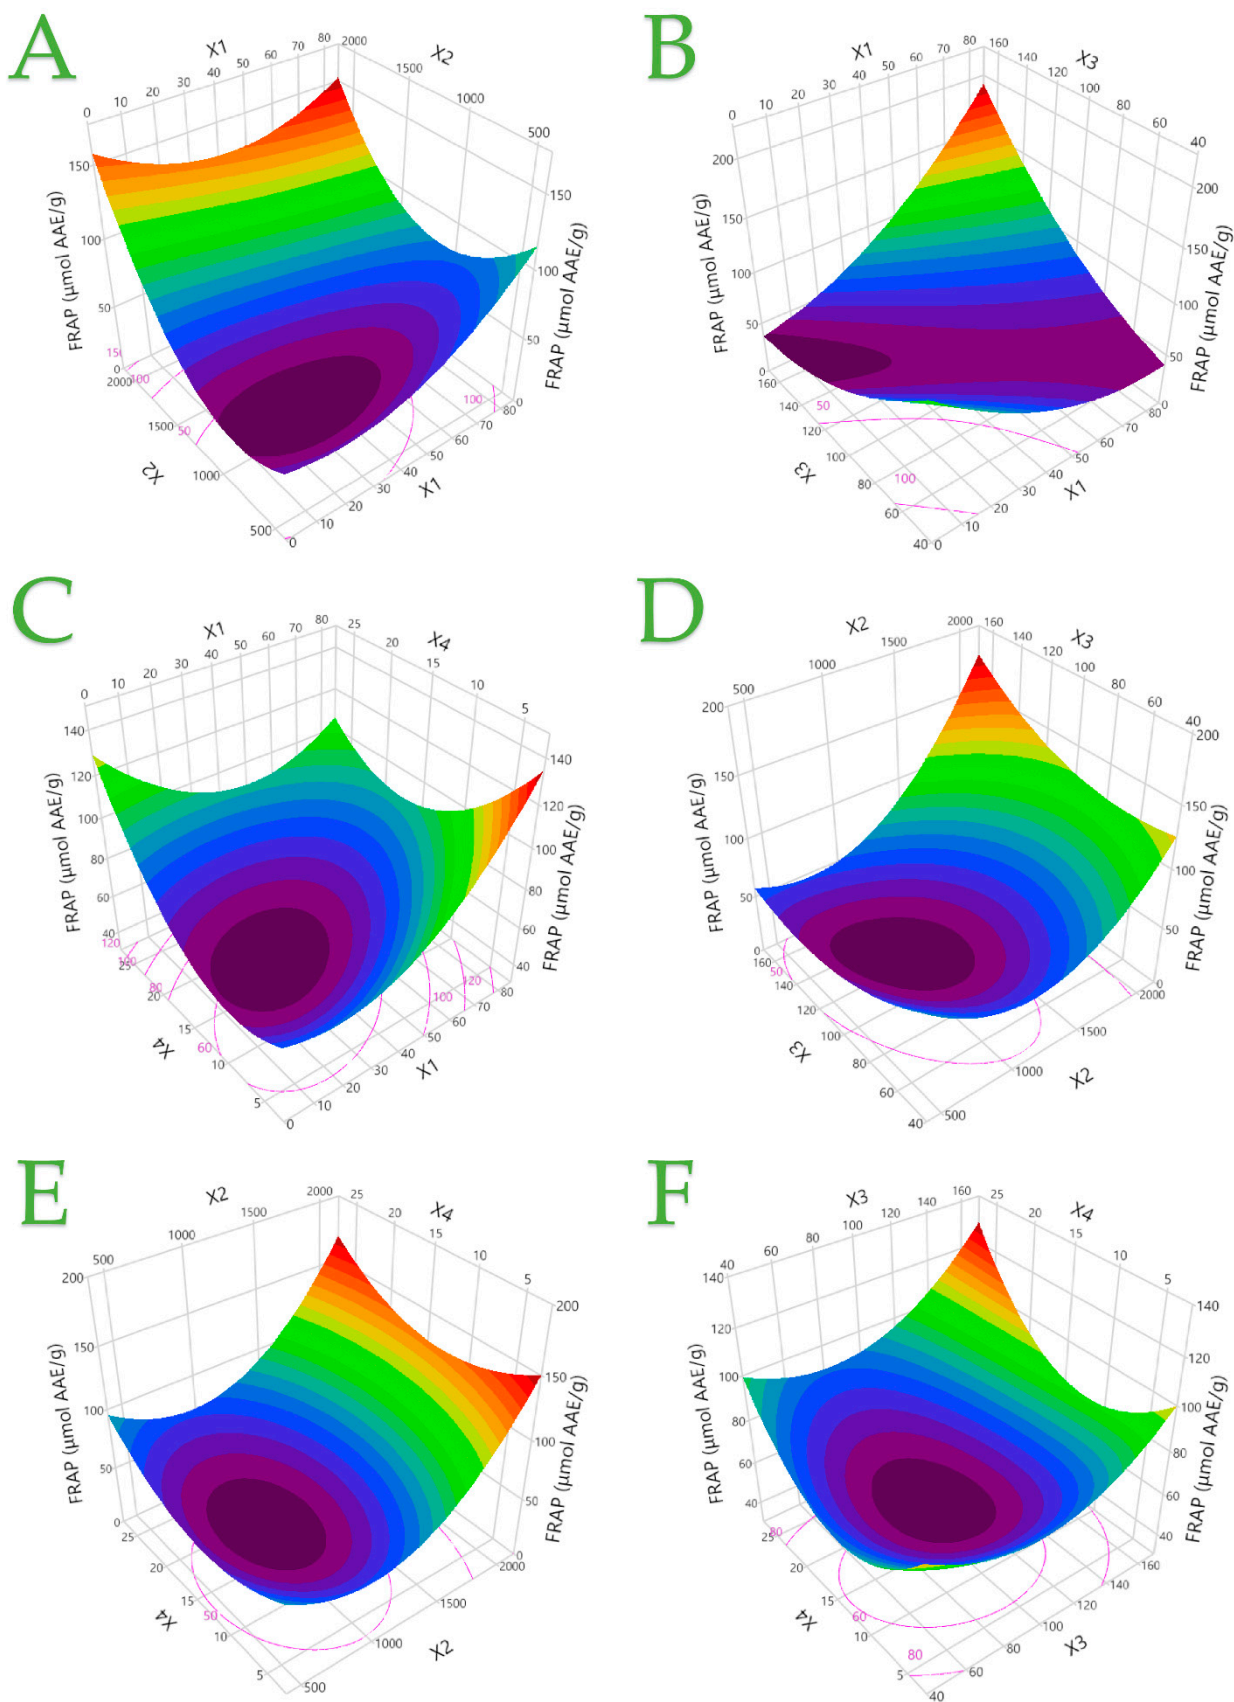

**Figure S9.** The optimal extraction of *M. oleifera* extracts is shown in 3D graphs that show the impact of the process variables considered in the response (FRAP,  $\mu\text{mol AAE/g}$ ). Plot (A), covariation of X1 and X2; plot (B), covariation of X1 and X3; plot (C), covariation of X1 and X4; plot (D), covariation of X2 and X3; plot (E), covariation of X2 and X4; plot (F), covariation of X3 and X4.

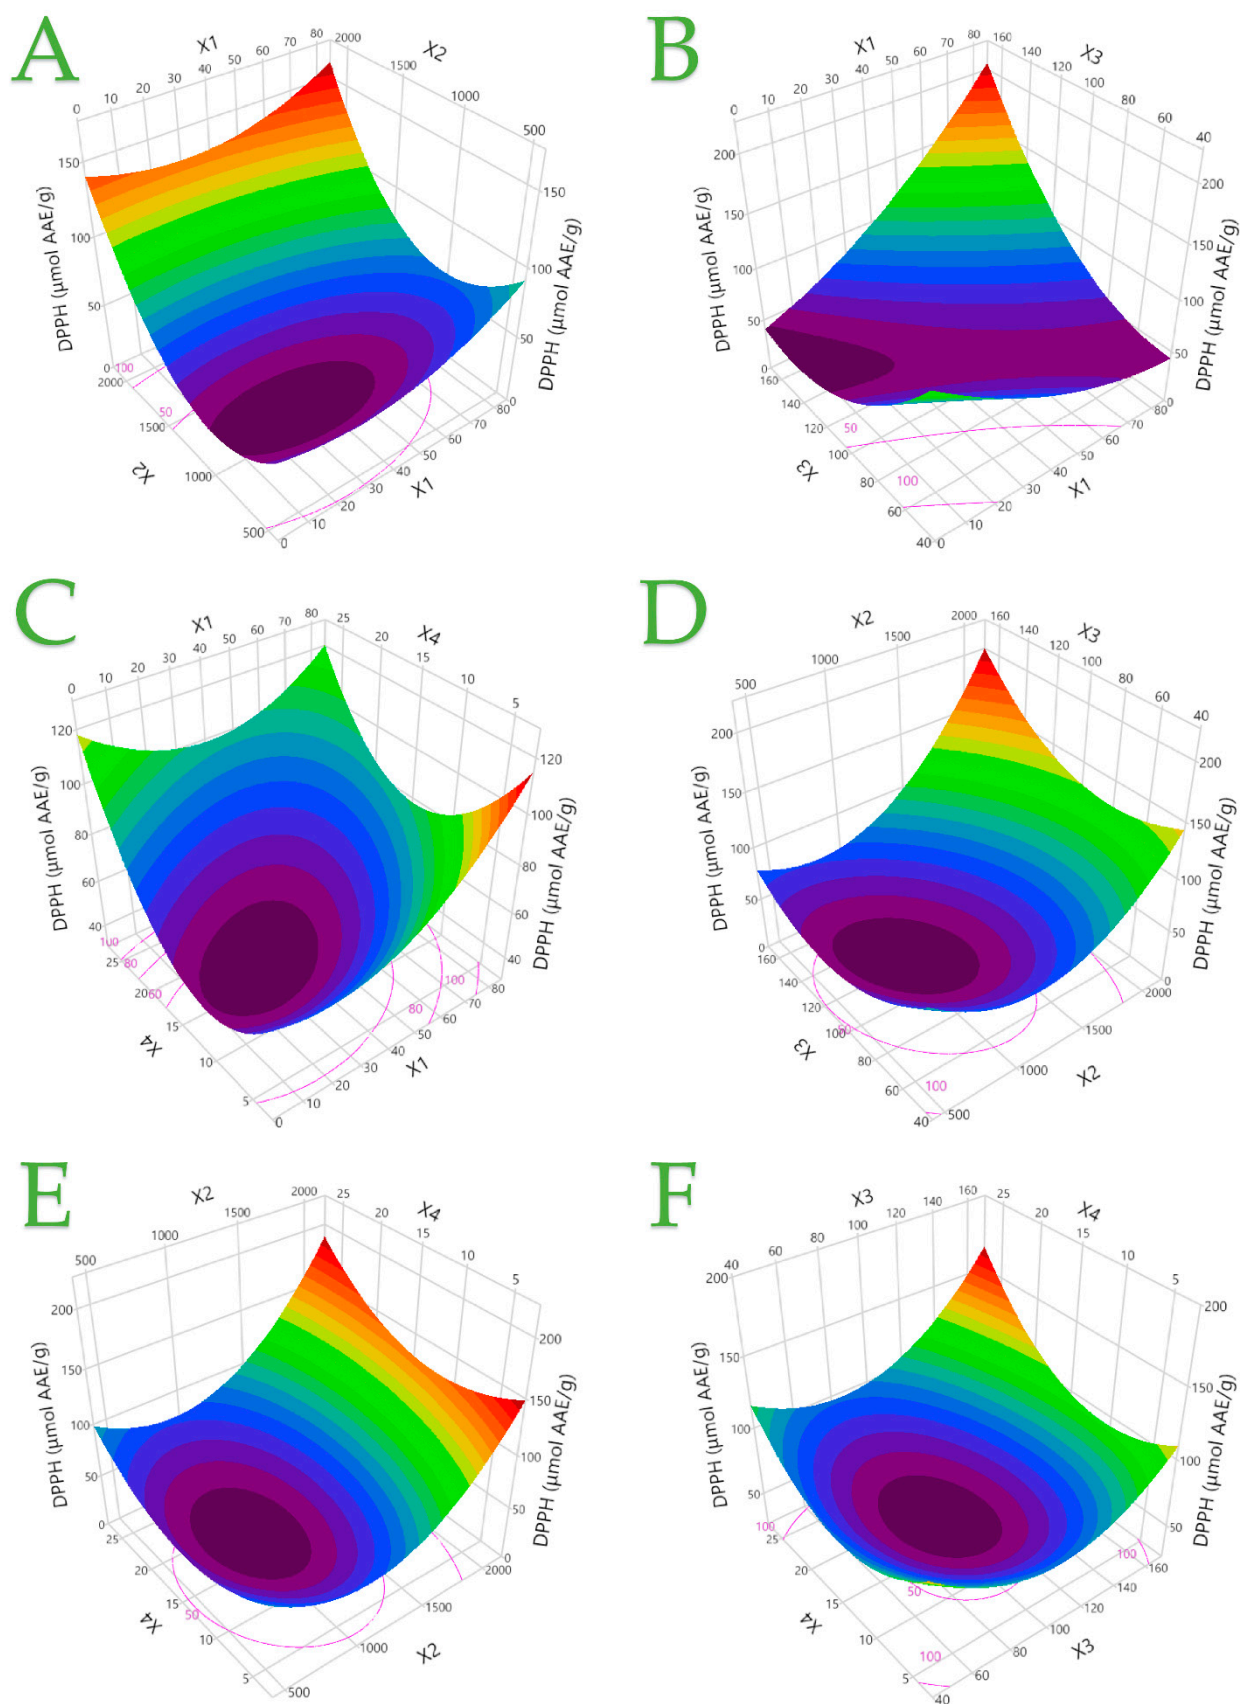

**Figure S10.** The optimal extraction of *M. oleifera* extracts is shown in 3D graphs that show the impact of the process variables considered in the response (DPPH,  $\mu\text{mol AAE/g}$ ). Plot (A), covariation of  $X_1$  and  $X_2$ ; plot (B), covariation of  $X_1$  and  $X_3$ ; plot (C), covariation of  $X_1$  and  $X_4$ ; plot (D), covariation of  $X_2$  and  $X_3$ ; plot (E), covariation of  $X_2$  and  $X_4$ ; plot (F), covariation of  $X_3$  and  $X_4$ .



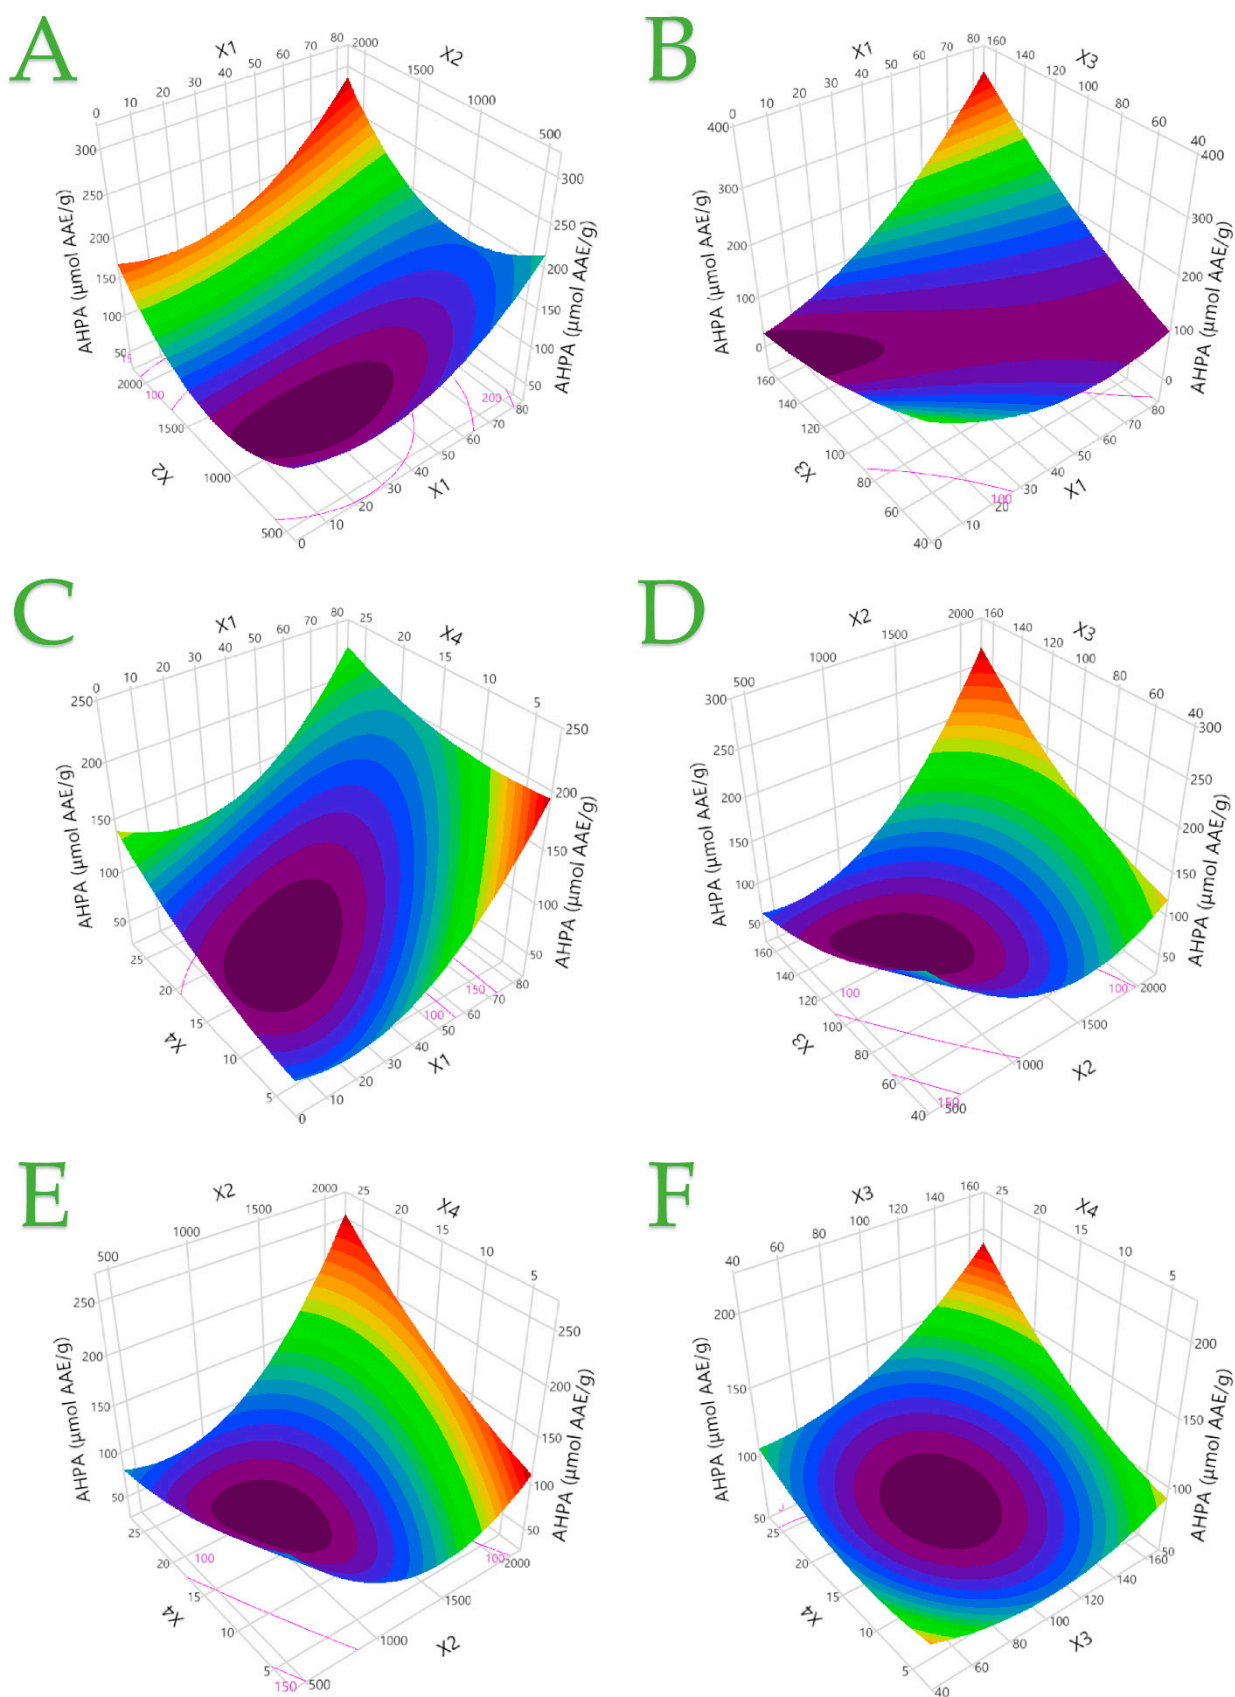

**Figure S11.** The optimal extraction of *M. oleifera* extracts is shown in 3D graphs that show the impact of the process variables considered in the response (Anti-Hydrogen Peroxide Activity – AHPA,  $\mu\text{mol AAE/g}$ ). Plot (A), covariation of  $X_1$  and  $X_2$ ; plot (B), covariation of  $X_1$  and  $X_3$ ; plot (C), covariation of  $X_1$  and  $X_4$ ; plot (D), covariation of  $X_2$  and  $X_3$ ; plot (E), covariation of  $X_2$  and  $X_4$ ; plot (F), covariation of  $X_3$  and  $X_4$ .

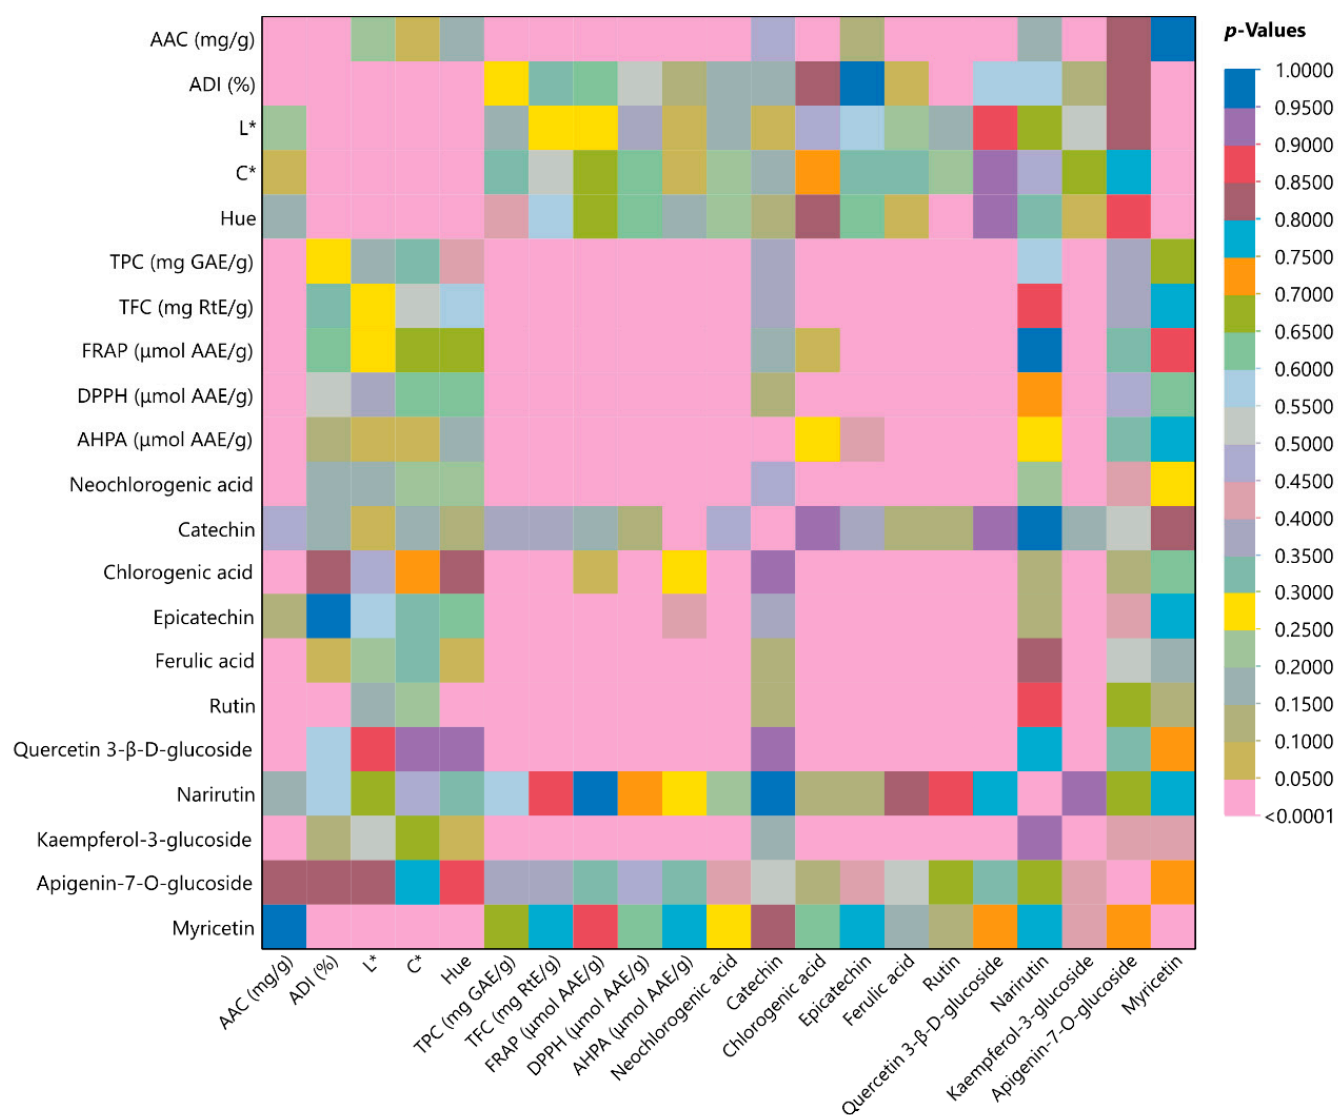

**Figure S12.** Multivariate color map to represent *p*-values of measured variables.
